# Supplementary material for: Extratropical circulation associated with Mediterranean droughts during the Last Millennium in CMIP5 simulations
Source: Copernicus journal article supplement (doi:10.5194/egusphere-2023-119), 2023-02-20
Supplement: Supplementary file 1 [file egusphere-2023-119-supplement.pdf]

*Supplement of*  
**Extratropical circulation associated with Mediterranean droughts  
during the Last Millennium in CMIP5 simulations**

Woon Mi Kim<sup>1,2,3</sup>, Santos J. González-Rojí<sup>1,2</sup>, and Christoph C. Raible<sup>1,2</sup>

<sup>1</sup>Climate and Environmental Physics, University of Bern, Bern, Switzerland

<sup>2</sup>Oeschger Centre for Climate Change Research, University of Bern, Bern, Switzerland

<sup>3</sup>Now at: National Center for Atmospheric Research, Boulder Colorado, United States

**Correspondence:** Woon Mi Kim (wmikim@ucar.edu)

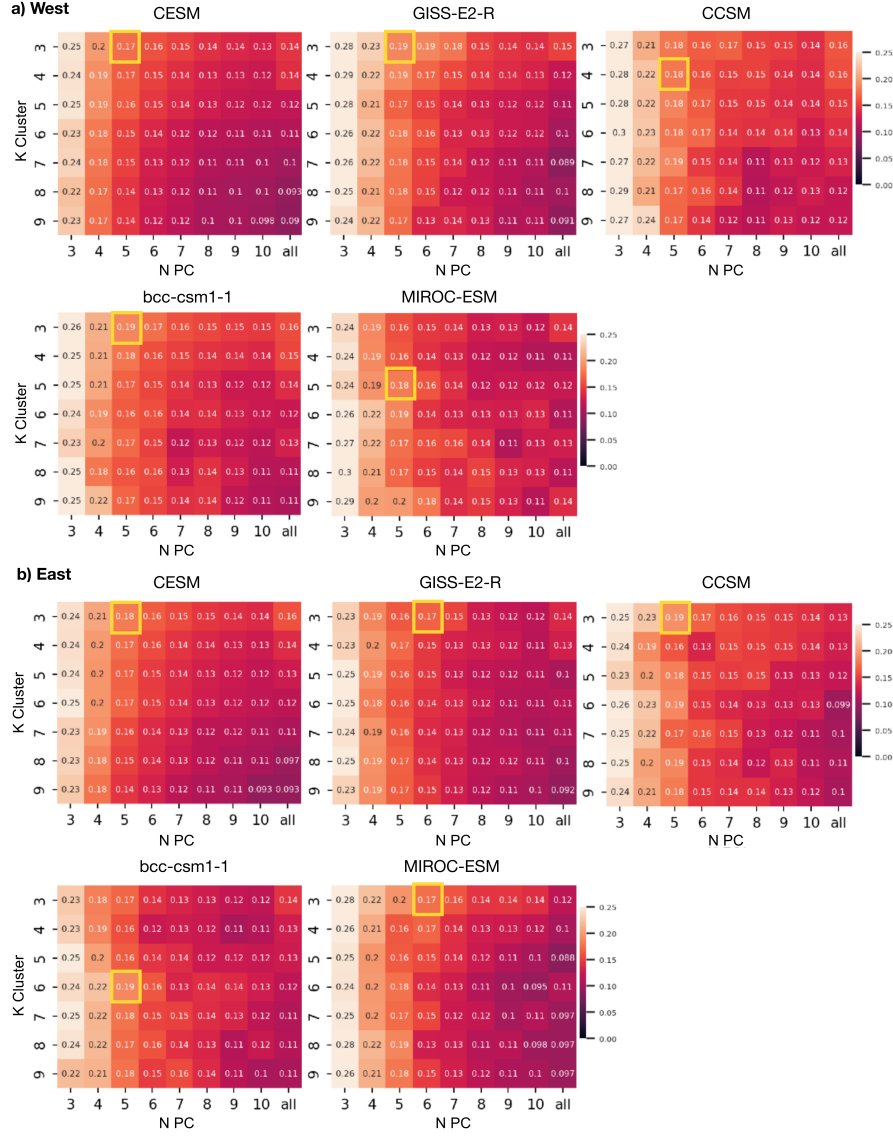

**Figure S1.** Silhouette coefficients ( $S$ ) for a range of  $N$  for PC and  $k$  for KCA for the LM simulations (a) in the western and (b) eastern Mediterranean. Chosen  $S$  is highlighted with a yellow box. *All* indicates the dataset before PCA is applied.

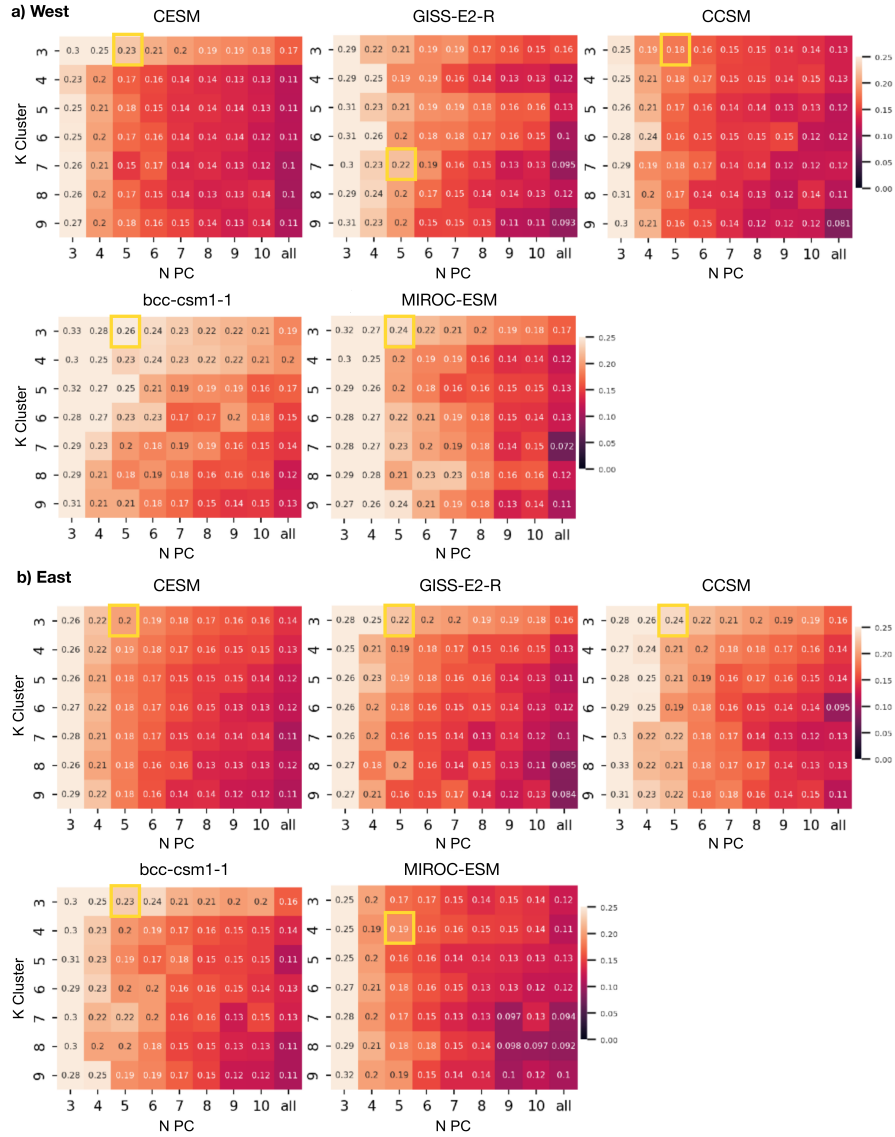

**Figure S2.** Same as Fig S1 but for the Hist simulations.
